# Supplementary material for: Identification of the Functional Variant(s) that Explain the Low-Density Lipoprotein Receptor (LDLR) GWAS SNP rs6511720 Association with Lower LDL-C and Risk of CHD
Source: PubMed Central journal article supplement (PMC5156384; doi:10.1371/journal.pone.0167676), 2016-12-14
Supplement: pone.0167676.s003.pdf [file pone.0167676.s003.pdf]

**S1 Table. Association of rs6511720 genotype and CHD risk in CARDIoGRAM and C4D**

| <b>SNP(allele)</b>                               | <b>log(OR)<br/>with CHD per-allele</b> | <b>SE (log(OR))</b> | <b>Sample numbers</b>         |
|--------------------------------------------------|----------------------------------------|---------------------|-------------------------------|
| <b>rs6511720 (T~minor allele)<br/>CARDIoGRAM</b> | - 0.1253                               | 0.03321             | 8948cases<br>4747 controls    |
| <b>rs6511720 (T~minor allele)<br/>C4D</b>        | - 0.1082                               | 0.0287              | 15393 cases<br>15036 controls |
| <b>fixed effects<br/>meta-analysis</b>           | - 0.1155                               | 0.0217              | 24341 cases<br>19783 controls |
