# Supplementary material for: Identification of the Functional Variant(s) that Explain the Low-Density Lipoprotein Receptor (LDLR) GWAS SNP rs6511720 Association with Lower LDL-C and Risk of CHD
Source: PubMed Central journal article supplement (PMC5156384; doi:10.1371/journal.pone.0167676), 2016-12-14
Supplement: pone.0167676.s004.pdf [file pone.0167676.s004.pdf]

**S2 Table: Association of rs6511620 genotype and lipid traits from data in Global lipids genetics consortium (GLGC)**

|              | <b>Reference allele</b> | <b>Beta</b> | <b>Se</b> | <b>p-value</b>          | <b>Sample size</b> |
|--------------|-------------------------|-------------|-----------|-------------------------|--------------------|
| <b>TC</b>    | T                       | -0.1851     | 0.0059    | $5.43 \times 10^{-202}$ | 184764             |
| <b>LDL-C</b> | T                       | -0.2209     | 0.0061    | $3.85 \times 10^{-262}$ | 170608             |
| <b>HDL-C</b> | T                       | 0.0249      | 0.0057    | $6.32 \times 10^{-005}$ | 184617             |
| <b>TG</b>    | T                       | -0.0084     | 0.0056    | 0.1043                  | 175280             |
