# Supplementary material for: Identification of the Functional Variant(s) that Explain the Low-Density Lipoprotein Receptor (LDLR) GWAS SNP rs6511720 Association with Lower LDL-C and Risk of CHD
Source: PubMed Central journal article supplement (PMC5156384; doi:10.1371/journal.pone.0167676), 2016-12-14
Supplement: pone.0167676.s005.pdf [file pone.0167676.s005.pdf]

**S3 Table. Predicted regulatory element and protein binding of *LDLR* selected SNPs**

| <b>SNP IDs</b>     | <b>Position (hg19)</b> | <b>Regulatory element [30]</b> | <b>Allele</b> | <b>Predicted protein binding (Haploreg)</b> | <b>Predicted protein binding (MatInspector)</b> |
|--------------------|------------------------|--------------------------------|---------------|---------------------------------------------|-------------------------------------------------|
| <b>rs6511720</b>   | 11202306               | Strong Enhancer                | G             | -                                           | BLMP                                            |
|                    |                        |                                | T*            | -                                           | GATA1, SNAP/PSE                                 |
| <b>rs141787760</b> | 11202194               | Active Promoter                | C             | CDP                                         | -                                               |
|                    |                        |                                | .*            | CHD2, CTCF, ELF1, Egr-1, SP1, Zic, and p300 | -                                               |
| <b>rs60173709</b>  | 11201988               | Active Promoter                | T             | EBF, Myf, Pax-5                             | -                                               |
|                    |                        |                                | .*            | GR and MAZ                                  | -                                               |
| <b>rs57217136</b>  | 11201124               | Active Promoter                | T             | FOXA1, FOXA2, and SREBP1                    | -                                               |
|                    |                        |                                | C*            | SP1                                         | OAZF/ROAZ                                       |

\* Minor allele
